# Supplementary material for: KIAA1199 promotes migration and invasion by Wnt/β-catenin pathway and MMPs mediated EMT progression and serves as a poor prognosis marker in gastric cancer
Source: PLoS One. 2017 Apr 19;12(4):e0175058. doi: 10.1371/journal.pone.0175058 (PMC5397282; doi:10.1371/journal.pone.0175058)
Supplement: S1 File — All data that make up the tables and figures within this paper is stored in this file as pre PLOS One requirements. (XLS) [file pone.0175058.s001.xls]

## Sheet: Table 1
Table 1	(Clinicopathological Information of Table 1)
	Sample ID	Gender	T Stage	N Stage	M Stage	TNM Stage	Differentiation
	1	male	4	3	1	4	Low differentiation
	2	female	4	0	0	3	Low differentiation
	3	male	4	3	0	3	Low differentiation
	4	male	4	0	0	2	Middle differentiation
	5	male	4	3	0	3	Middle-low differentiation
	6	female	4	2	1	3	Middle-low differentiation
	7	male	3	3	0	3	Low differentiation
	8	male	4	1	0	3	Low differentiation
	9	male	4	3	0	3
	10	male	2	1	0	2	Middle-low differentiation
	11	male	4	3	0	3	Middle-low differentiation
	12	male	1	0	0	1	Low differentiation
	13	female	3	2	0	3	Middle differentiation
	14	male	4	3	0	3	Middle differentiation
	15	female	4	1	0	3
	16	male	3	0	0	2
	17	male	4	3	0	3	Low differentiation
	18	male	4	3	0	3	Low differentiation
	19	male	4	0	0	2	Middle differentiation
	20	male	4	1	0	3	Middle-high differentiation
	21	male	4	3	0	3	Low differentiation
	22	male		2
	23	male	4	3	1	4	Low differentiation
	24	male	4	2	0	3	Low differentiation
	25	male	3	1	0	2
	26	male	3	2	1	3
	27	male	4	3	0	3	Low differentiation
	28	male	4	3	0	3	Middle differentiation
	29	male	4	0	0	2	Middle differentiation
	30	male	4	1	0	3	Middle-low differentiation
	31	male	4	3	0	3	Middle-low differentiation
	32	male	4	2	0	3	Middle-low differentiation
	33	male	4	1	0	3	Low differentiation
	34	male	3	3	0	3	Low differentiation
	35	male	4	1	1	3	Low differentiation
	36	male	4	3	0	3	Low differentiation
	37	female	4	3	0	3	Low differentiation
	38	female	4	0	0	2	High differentiation
	39	male	4	3	0	3	Middle-low differentiation
	40	male	1	0	0	1	Middle-low differentiation
	41	male	4	3	1	3	Middle differentiation
	42	male	4	0	0	2	Low differentiation
	43	male		3			Low differentiation
	44	male	4	3	0	3	Low differentiation
	45	male	2	3	0	3	Middle differentiation
	46	female	3	0	1	2
	47	male	2	1	0	2	Middle differentiation
	48	male	3	2	0	3	Middle-low differentiation
	49	male	2	0	0	1	Middle differentiation
	50	male	4	1	0	3	Low differentiation
	51	female	4	2	0	3	Middle-low differentiation
	52	male	4	2	1	3	Middle-low differentiation
	53	female	4	3	0	3
	54	female	4	2	0	3
	55	female	3	0	0	2	Middle-high differentiation
	56	male	4	2	0	3	Middle differentiation
	57	female	4	2	1	3	Low differentiation
	58	male	4	3	0	3	Middle differentiation
	59	male	4	1	0	3	Middle differentiation
	60	male	4	2	0	3	Middle-low differentiation
	61	male	4	2	0	3	Low differentiation
	62	male	4	3	0	3	Middle differentiation
	63	male	4	2	1	3	Low differentiation
	64	male	2	2	0	2
	65	male	4	3	0	3	Low differentiation
	66	male	4	1	1	3	Middle-high differentiation
	67	male	3	2	0	3	Middle differentiation
	68	male	4	2	0	3	Low differentiation
	69	male	3	3	0	3	Middle-low differentiation
	70	male	3	3	0	3	Middle-low differentiation
	71	male	3	0	0	2	Low differentiation
	72	female	4	3	0	3	Low differentiation
	73	female	4	2	0	3	Low differentiation
	74	male	4	3	0	3	Low differentiation
	75	female	4	2	0	3	Low differentiation
	76	female	3	3	1	3	Middle-low differentiation
	77	male	4	3	0	3	Middle-low differentiation
	78	female	4	0	0	2	Low differentiation
	79	male	4	3	1	3	Low differentiation
	80	male	3	1	0	2	Middle-low differentiation
	81	male	1	0	0	1	Middle-low differentiation
	82	male	2	1	0	2	Low differentiation
	83	male
	84	male	2	0	0	1	Middle differentiation
	85	female	4	3	0	3	Middle-low differentiation
	86	male	4	0	0	2	Middle-low differentiation
	87	male	4	0	0	2	Low differentiation
	88	male	4	2	0	3	Middle-low differentiation
	89	male	4	3	0	3
	90	male	4	0	0	2	Middle differentiation
	91	male	4	3	0	3	Low differentiation
	92	female	4	0	0	3	Low differentiation
	93	male	1	0	0	1	Middle-low differentiation
	94	female	4	3	1	4	Low differentiation
	95	male	4	1	0	3	Middle differentiation
	96	male	4	3	0	3	Low differentiation
	97	male	4	0	0	2	Low differentiation
	98	female	4	1	1	3	Low differentiation
	99	female	2	1	0	2	Low differentiation
	100	female	4	3	0	3	Low differentiation
	101	male	2	3	0	3	Low differentiation
	102	female	4	3	0	3	Low differentiation
	103	male	4	2	0	3	Low differentiation
	104	female	2	0	0	1	Middle differentiation
	105	male	4	1	0	3	Low differentiation
	106	female	4	1	0	3	Middle differentiation
	107	male	4	1	0	3	Middle differentiation
	108	male	4	0	0	2	Middle differentiation
	109	male	4	3	0	3	Low differentiation
	110	male
	111	male	4	3	0	3	Low differentiation
	112	male	4	0	0	2	Low differentiation
	113	male	2	3	0	3	Low differentiation
	114	male	4	3	0	3	Low differentiation
	115	male	4	0	0	2	Middle differentiation
	116	male	4	3	1	3	Middle-low differentiation
	117	female	4	0	0	2	Middle-low differentiation
	118	male	4	3	0	3	Low differentiation
	119	female	4	3	0	3	Middle-low differentiation
	120	male	2	0	0	1	Middle differentiation
	121	male	4	3	0	3	Middle-low differentiation
	122	male	4	1	0	3	Middle differentiation
	123	female	1	1	0	1
	124	female	4	0	0	2	Low differentiation
	125	male	4	1	0	3	Middle differentiation
	126	male	4	2	0	3	Low differentiation
	127	male	4	3	1	3	Middle differentiation
	128	male	4	2	0	3	Low differentiation
	129	male	4	0	0	3	Middle-low differentiation
	130	male	4	3	0	3	Low differentiation
	131	female	3	3	1	3
	132	male					High differentiation
	133	male	4	3	0	3	Low differentiation
	134	male	4	2	0	3	Middle differentiation
	135	male	4	2	0	3	Low differentiation
	136	male	4	3	1	3	Middle differentiation
	137	female	4	1	0	3	Middle differentiation
	138	male	4	2	0	3	Middle-low differentiation
	139	male	4	1	1	3	Middle differentiation
	140	male	3	0	0	2	Middle-low differentiation
	141	male	3	3	1	3	Low differentiation
	142	female	4	2	0	3	Low differentiation
	143	female	4	3	0	3	Low differentiation
	144	female	2	0	0	1
	145	female	1	0	0	1	Middle-low differentiation
	146	male	4	1	0	3	Middle-low differentiation
	147	female	4	0	0	2	Low differentiation
	148	male	4	3	0	3	Middle differentiation
	149	male	4	2	0	3	Middle differentiation
	150	female	1	0	0	1	Middle differentiation
	151	female	3	0	0	2	Middle-low differentiation
	152	female	2	1	0	2	Middle-low differentiation
	153	female	4	3	0	3	Low differentiation
	154	male	4	0	0	2	Middle-low differentiation
	155	female	4	3	0	3	Low differentiation
	156	male	4	3	0	3	Low differentiation
	157	male	4	0	0	2	Middle differentiation
	158	male	4	2	0	3	Middle-low differentiation
	159	female	4	3	0	3	Middle-low differentiation
	160	female	4	3	0	3	Middle-low differentiation
	161	male	4	2	0	3	Middle-low differentiation
	162	female	4	1	0	3	Low differentiation
	163	male	4	2	0	3	Middle-low differentiation
	164	female	4	3	0	3	Low differentiation
	165	male	4	3	0	3	Middle-low differentiation
	166	male	4	3	0	3	Middle-low differentiation
	167	male	2	1	0	2	Middle-high differentiation
	168	male	4	3	0	3	Low differentiation
	169	female	4	3	0	3	Low differentiation
	170	male	4	0	0	2	Middle-low differentiation
	171	male	4	2	0	3	Low differentiation
	172	male	2	1	0	2	Low differentiation
	173	male	4	1	0	3	Middle differentiation
	174	female	4	3	0	3	Middle-low differentiation
	175	female	4	1	0	3	Low differentiation
	176	female	4	0	0	2	Low differentiation
	177	male	4	1	0	3	Middle-low differentiation
	178	male	4	3	0	3	Middle-low differentiation
	179	female	4	3	0	3	Low differentiation
	180	male	4	2	0	3	Middle-low differentiation
	181	male	4	2	0	3	Low differentiation
	182	male	1	0	0	1	Middle-low differentiation
	183	male	4	2	0	3	Middle differentiation
	184	male	4	3	0	3	Low differentiation
	185	female	4	3	0	3	Middle-low differentiation
	186	male	2	0	0	1	Middle differentiation
	187	male	4	3	0	3	Middle-low differentiation
	188	male	4	3	0	3	Middle-low differentiation
	189	male	4	1	0	3	Middle-low differentiation
	190	male	4	2	0	3	Middle-low differentiation
	191	female	4	3	0	3	Low differentiation
	192	male	2	2	0	2	Low differentiation
	193	female	4	3	0	3	Low differentiation
	194	male	4	1	0	3	Low differentiation
	195	female	1	0	0	1	Low differentiation
	196	male	2	2	0	2	Low differentiation
	197	male	4	3	0	3	Middle-low differentiation
	198	male	1	0	0	1	Middle differentiation
	199	male	3	2	0	3	Middle differentiation
	200	female	4	1	1	3	Low differentiation
	201	male	4	3	0	3	Middle-low differentiation
	202	female	4	2	0	3
	203	male	4	3	1	3	Middle differentiation
	204	male	4	3	0	3	Middle-low differentiation
	205	male	4	3	0	3	Low differentiation
	206	female	4	3	0	3	Low differentiation
	207	male	4	3	1	4	Middle differentiation
	208	male	3	3	0	3	Low differentiation
	209	male	4	3	0	3	Middle differentiation
	210	male	4	3	1	3	Middle-low differentiation
	211	male	3	3	0	3	Middle differentiation
	212	male	4	2	0	3	Middle differentiation
	213	male	4	2	0	3	Middle-low differentiation
	214	male	4	2	0	3	Low differentiation
	215	male	4	3	0	3	Low differentiation
	216	male	4	1	0	3	Middle-low differentiation
	217	male	4	3	0	3	Low differentiation
	218	male	3	3	0	3	Low differentiation
	219	female	4	1	0	3	Low differentiation
	220	female	4	1	0	3	Low differentiation
	221	male	4	0	0	2
	222	male	4	0	0	2	Low differentiation
	223	male	3	0	1	2	Low differentiation
	224	male	4	3	0	3	Low differentiation
	225	male	3	2	0	3
	226	male	3	1	0	2	Middle-low differentiation
	227	female	4	3	1	4	Low differentiation
	228	female	4	3	0	3	Low differentiation
	229	female	2	0	0	1	Low differentiation
	230	male	4	3	0	3	Middle-low differentiation
	231	male	3	0	0	2
	232	male	4	3	0	3	Low differentiation
	233	female	4	2	0	3	Low differentiation
	234	male	4	2	0	3	Middle differentiation
	235	female	4	3	1	4	Low differentiation
	236	male	3	3	0	3	Low differentiation
	237	male	4	0	0	2	Middle differentiation
	238	male	4	3	1	3	Low differentiation
	239	female	4	1	0	3	Low differentiation
	240	female	1	1	0	1	Middle-low differentiation
	241	male	4	2	0	3	Middle-high differentiation
	242	male					High differentiation
	243	male	2	2	0	2	Low differentiation
	244	male	1	0	0	1	Middle differentiation
	245	male	4	0	0	2	Low differentiation
	246	female	2	1	0	2	Low differentiation
	247	male	4	2	0	3	Middle-low differentiation
	248	male	4	2	0	3
	249	female	4	0	0	2	Low differentiation
	250	female	4	0	0	2	Middle differentiation
	251	male	4	2	0	3
	252	male	4	3	0	3	Middle differentiation
	253	male	4	3	0	3	Middle-low differentiation
	254	female	4	3	0	3	Low differentiation
	255	male					High differentiation
	256	male	2	0	0	1	Middle differentiation
	257	female	4	3	0	3	Middle-low differentiation
	258	female	4	3	0	3	Low differentiation
	259	female	4	3	0	3
	260	female	4	3	0	3	Low differentiation
	261	male	2	0	0	1	Middle differentiation
	262	male	1	0	0	1	Middle-low differentiation
	263	male	4	2	0	3	Low differentiation
	264	male	4	3	0	3
	265	male	4	3	0	3
	266	female	1	0	0	1	Middle-low differentiation
	267	male	4	3	0	3	Middle differentiation
	268	female	4	3	0	3	Middle-low differentiation
	269	male	1	0	0	1	Middle differentiation
	270	male	4	2	0	3	Low differentiation
	271	male	4	3	0	3
	272	male	1	0	0	1	Low differentiation
	273	male	4	0	0	2	Middle-low differentiation
	274	male	4	3	0	3	Low differentiation
	275	female	3	3	0	3	Middle-low differentiation
	276	male	4	1	0	3	Low differentiation
	277	male	4	0	0	2	Low differentiation
	278	male	4	2	1	3	Middle differentiation
	279	female	2	2	1	4	Middle differentiation
	280	female	4	3	0	3
	281	male	3	1	0	2	Middle differentiation
	282	female	4	3	1	4	Low differentiation
	283	male	4	3	1	3	Middle-low differentiation
	284	male	3	3	0	3	Low differentiation
	285	female	4	3	0	3
	286	female	4	3	1	4	Low differentiation
	287	male	4
	288	male	3	3	0	3	Middle-low differentiation
	289	male	4	0	0	2	Low differentiation
	290	female	4	3	0	3	Low differentiation
	291	male	4	3	0	3	Low differentiation
	292	male	4	3	0	3	Low differentiation
	293	female	4	2	0	3	Middle-low differentiation
	294	male	4	3	0	3
	295	male	3	0	0	2	Low differentiation
	296	male	4	2	1	3	Middle-low differentiation
	297	female	3	1	0	2	Middle-low differentiation
	298	male		0			High differentiation
	299	female	3	3	1	3	Middle-low differentiation
	300	male	3	2	1	3	Middle differentiation
	301	male	3	0	0	2	Middle differentiation
	302	male	4	2	0	3	Middle-low differentiation
	303	male	4	2	0	3	Middle differentiation
	304	male	3	3	0	3	Low differentiation
	305	male	4	1	0	3	Middle-high differentiation
	306	male	2	3	0	3	Low differentiation
	307	male	4	3	0	3	Low differentiation
	308	male	4	3	0	3	Middle-low differentiation
	309	male	3	0	0	2	Middle-low differentiation
	310	male	4	2	0	3	Low differentiation
	311	male	4	3	1	3	Middle-low differentiation
	312	male	4	1	0	3	Low differentiation
	313	male	4	2	0	3	Low differentiation
	314	female	4	3	0	3	Low differentiation
	315	female	3	3	0	3	Low differentiation
	316	male	4	2	0	3	Low differentiation
	317	female	4	3	1	3	Low differentiation
	318	female	3	2	1	3	Middle-low differentiation
	319	male	4	0	0	2	Middle differentiation
	320	male	4	3	0	3	Middle-low differentiation
	321	female	4	0	0	2	Middle differentiation

## Sheet: Tables 2-3
Tables 2-3	(Clinicopathological Information of Tables 2-3)
	Pathological Number	KIAA1199 postive(1)/negative(0)	Gender	Age	Differentiation	Vascular invasion	TNM Stage	T Stage	N Stage	M Stage
	1	1	male	39	Low differentiation	1	4	1a	3a	1
	2	0	female	68	Low differentiation	0	1	1a	0	0
	3	1	male	48	Middle-low differentiation	0	1	1a	0	0
	4	1	female	74	Middle differentiation	0	1	1a	0	0
	5	0	female	61	Low differentiation	0	1	1a	0	0
	6	0	male	65	Middle differentiation	0	1	1b	0	0
	7	1	male	44	Middle-low differentiation	1	1	1b	0	0
	8	0	male	63	Middle differentiation	unknown	1	1b	0	0
	9	0	male	43	Low differentiation	unknown	1	2a	0	0
	10	0	male	51	Middle-high differentiation	1	2	2a	0	0
	11	0	male	51	Middle differentiation	0	2	2a	0	0
	12	0	female	64	Low differentiation	0	2	2a	0	0
	13	1	male	49	Middle-low differentiation	unknown	2	2b	0	0
	14	0	female	38	Low differentiation	0	2	2b	0	0
	15	0	male	72	Middle differentiation	0	2	2b	0	0
	16	0	female	35	Low differentiation	1	2	2b	0	0
	17	0	male	66	Middle-low differentiation	0	2	2b	0	0
	18	1	female	63	Middle differentiation	1	2	2b	0	0
	19	0	male	62	Middle-low differentiation	1	2	2b	0	0
	20	0	female	41	Low differentiation	1	2	2b	0	0
	21	1	female	76	Low differentiation	1	2	2b	0	0
	22	0	male	55	Middle-low differentiation	1	2	3a	0	0
	23	0	female	62	Low differentiation	0	3	3a	0	0
	24	1	female	70	Middle-high differentiation	0	3	3a	0	0
	25	0	female	59	Low differentiation	1	3	3a	0	0
	26	0	male	66	Middle differentiation	0	3	3a	0	0
	27	0	female	59	Low differentiation	0	3	3b	0	0
	28	1	male	55	Middle-high differentiation	0	3	3b	0	0
	29	0	male	61	Low differentiation	1	3	3b	0	0
	30	0	female	53	Middle differentiation	0	3	3b	0	0
	31	1	male	43	Low differentiation	1	3	3b	0	0
	32	0	male	33	Low differentiation	1	3	3b	0	0
	33	0	male	73	Middle-low differentiation	0	3	3b	0	0
	34	1	male	34	Middle-low differentiation	0	3	3b	0	0
	35	0	female	48	Middle-low differentiation	1	3	3b	0	0
	36	0	male	30	Low differentiation	1	3	3c	0	0
	37	1	female	22	Low differentiation	0	3	3c	0	0
	38	1	female	62	Low differentiation	1	3	3c	0	0
	39	1	male	58	Middle-low differentiation	0	3	3c	0	0
	40	1	male	68	Middle-low differentiation	1	3	3c	0	0
	41	0	male	70	Middle-low differentiation	1	3	3c	0	0
	42	0	male	44	Low differentiation	0	3	3c	0	0
	43	0	male	55	Low differentiation	0	3	4	0	0
	44	1	male	55	Middle-low differentiation	1	4	4	0	1
	45	1	female	73	Middle-low differentiation	1	4	4	0	1
	46	1	male	56	Middle-high differentiation	unknown	4	4	1	1
	47	1	male	54	Middle-low differentiation	1	4	4	1	1
	48	1	male	67	Middle differentiation	1	4	4	1	1
	49	0	female	65	Low differentiation	1	4	4	1	1
	50	1	female	55	Low differentiation	1	4	4	1	1
	51	1	female	52	Low differentiation	1	4	4	1	1
	52	1	male	75	Low differentiation	1	4	1b	1	1
	53	1	male	68	Middle differentiation	0	1	2a	1	0
	54	0	male	70	Low differentiation	0	2	2a	1	0
	55	0	female	42	Low differentiation	0	2	2a	1	0
	56	0	male	49	Low differentiation	0	2	2a	1	0
	57	0	male	64	Low differentiation	0	2	2b	1	0
	58	1	female	68	Middle-low differentiation	1	2	2b	1	0
	59	0	female	65	Low differentiation	0	2	2b	1	0
	60	1	female	56	Low differentiation	0	2	2b	1	0
	61	0	male	65	Middle differentiation	0	2	2b	1	0
	62	0	female	60	Middle differentiation	0	2	2b	1	0
	63	0	male	49	Middle-low differentiation	1	2	2b	1	0
	64	1	female	63	Middle-low differentiation	0	2	2b	1	0
	65	1	female	37	Low differentiation	0	2	3a	1	0
	66	1	male	58	Low differentiation	1	3	3a	1	0
	67	1	female	75	Middle differentiation	1	3	3a	1	0
	68	1	male	81	Low differentiation	1	3	3a	1	0
	69	0	male	81	Low differentiation	1	3	3a	1	0
	70	1	male	57	Low differentiation	1	3	3a	1	0
	71	1	male	79	Low differentiation	1	3	3a	1	0
	72	1	male	72	High differentiation	0	3	3a	1	0
	73	1	male	73	High differentiation	1	3	3a	1	0
	74	1	male	73	Low differentiation	0	3	3b	1	0
	75	1	male	63	Middle differentiation	1	3	3b	1	0
	76	1	female	33	Middle differentiation	1	3	3b	1	0
	77	0	female	67	Low differentiation	1	3	3b	1	0
	78	0	female	60	Low differentiation	1	3	3b	1	0
	79	1	male	77	Middle-low differentiation	0	3	3b	1	0
	80	1	male	75	Low differentiation	1	3	3b	1	0
	81	1	male	63	Low differentiation	1	3	3b	1	0
	82	0	male	60	Low differentiation	1	3	3b	1	0
	83	1	female	51	Middle-low differentiation	1	3	3b	1	0
	84	0	female	60	Low differentiation	1	3	3b	1	0
	85	1	male	77	Low differentiation	1	3	3b	1	0
	86	1	male	60	Low differentiation	1	3	3b	1	0
	87	0	male	55	Low differentiation	0	3	3b	1	0
	88	1	male	59	Middle-low differentiation	1	3	3b	1	0
	89	0	male	64	Low differentiation	1	3	3b	1	0
	90	1	male	66	Middle-low differentiation	1	3	3b	1	0
	91	1	male	65	Low differentiation	1	3	3b	1	0
	92	1	male	58	Low differentiation	1	3	3b	1	0
	93	0	female	42	Low differentiation	1	3	3b	1	0
	94	1	male	61	Low differentiation	1	3	3b	1	0
	95	1	male	55	Low differentiation	1	3	3b	1	0
	96	1	male	62	Middle differentiation	1	3	3c	1	1
	97	1	female	66	Low differentiation	1	3	3c	1	0
	98	0	male	57	Low differentiation	1	3	3c	1	0
	99	1	male	26	Low differentiation	1	3	3c	1	0
	100	0	female	55	Low differentiation	1	3	3c	1	0
	101	1	female	66	Low differentiation	1	3	3c	1	0
	102	1	female	65	Low differentiation	1	3	3c	1	0
	103	1	male	70	Low differentiation	1	3	3c	1	0
	104	1	male	76	Low differentiation	0	3	3c	1	0
	105	1	female	25	Middle-low differentiation	1	3	3c	1	0
	106	0	male	61	Middle-low differentiation	1	3	3c	1	0
	107	1	male	58	Low differentiation	0	3	3c	1	0
	108	1	male	67	High differentiation	1	3	3c	1	0
	109	1	male	70	Middle-low differentiation	1	3	3c	1	0
	110	1	male	57	Low differentiation	1	3	3c	1	0
	111	0	male	65	Low differentiation	1	3	3c	1	0
	112	1	male	72	Low differentiation	1	3	3c	1	0
	113	1	female	65	Low differentiation	0	3	3c	1	0
	114	0	female	34	Low differentiation	1	3	3c	1	0
	115	1	female	68	Low differentiation	1	3	3c	1	0
	116	1	female	66	Low differentiation	1	3	3c	1	1
	117	0	male	46	Low differentiation	1	3	4	1	1
	118	1	male	75	Middle-low differentiation	0	4	3a	1	1
	119	1	male	49	Middle-high differentiation	0	3	3a	1	0
	120	1	female	72	Low differentiation	1	3	3a	1	0
	121	1	male	62	High differentiation	0	3	3c	1	0
	122	1	male	68	Low differentiation	1	3	3b	1	0
	123	1	male	63	Middle-low differentiation	0	3	4a	1	0

## Sheet: Figure 1B and 1C
Fig 1B and 1C	(KIAA1199 expression and the survival information of patients)
	Pathological Number	KIAA1199 postive(1)/negative(0)	survival	survival length
	1	1	0	0.558843
	2	0	0	47.8632
	3	1	0	75.2465
	4	1	0	72.6167
	5	0	0	97.0743
	6	0	0	74.7616
	7	1	0	96.4497
	8	0	0	81.9198
	9	0	0	72.5181
	10	0	0	85.3715
	11	0	0	67.6857
	12	0	0	85.7331
	13	1	0	85.4043
	14	0	0	98.3892
	15	0	0	60.7495
	16	0	0	72.5838
	17	0	0	95.2005
	18	1	0	36.3248
	19	0	0	83.9579
	20	0	0	85.5781
	21	1	0	12.0644
	22	0	0	76.1341
	23	0	0	93.4254
	24	1	0	85.8646
	25	0	0	71.8277
	26	0	0	85.6345
	27	0	0	72.4852
	28	1	0	15.1545
	29	0	0	2.99145
	30	0	0	84.8126
	31	1	0	7.56082
	32	0	0	72.8797
	33	0	0	73.8988
	34	1	0	94.9375
	35	0	0	7.19921
	36	0	0	72.7482
	37	1	0	34.8126
	38	1	0	71.3346
	39	1	0	0.394477
	40	1	0	83.169
	41	0	0	81.1966
	42	0	0	60.4865
	43	0	0	96.6247
	44	1	1	20.8744
	45	1	1	0.262985
	46	1	1	12.7876
	47	1	1	3.58317
	48	1	1	3.68179
	49	0	1	11.9329
	50	1	1	3.28731
	51	1	1	2.07101
	52	1	1	8.80999
	53	1	1	26.3642
	54	0	1	42.7679
	55	0	1	12.0973
	56	0	1	28.7311
	57	0	1	9.04011
	58	1	1	19.5266
	59	0	1	29.0598
	60	1	1	26.5615
	61	0	1	58.6456
	62	0	1	4.56936
	63	0	1	42.4063
	64	1	1	63.0178
	65	1	1	32.4458
	66	1	1	63.7738
	67	1	1	27.0217
	68	1	1	12.7876
	69	0	1	12.7876
	70	1	1	9.20548
	71	1	1	51.9395
	72	1	1	42.5707
	73	1	1	17.1269
	74	1	1	14.2998
	75	1	1	5.22682
	76	1	1	26.693
	77	0	1	3.87945
	78	0	1	30.7035
	79	1	1	5.55556
	80	1	1	7.95529
	81	1	1	26.8603
	82	0	1	26.6601
	83	1	1	17.7844
	84	0	1	22.7482
	85	1	1	0.164366
	86	1	1	17.9816
	87	0	1	42.4063
	88	1	1	38.3958
	89	0	1	0.821828
	90	1	1	6.1144
	91	1	1	26.0355
	92	1	1	23.8001
	93	0	1	13.7081
	94	1	1	11.9987
	95	1	1	61.3083
	96	1	1	4.79947
	97	1	1	3.35306
	98	0	1	12.7219
	99	1	1	3.58317
	100	0	1	10.5194
	101	1	1	0
	102	1	1	13.3465
	103	1	1	1.77515
	104	1	1	21.3018
	105	1	1	9.20447
	106	0	1	1.93951
	107	1	1	47.8961
	108	1	1	37.1137
	109	1	1	5.42466
	110	1	1	8.71137
	111	0	1	5.65417
	112	1	1	9.07397
	113	1	1	8.71137
	114	0	1	30.572
	115	1	1	6.57462
	116	1	1	29.6844
	117	0	1	6.70611
	118	1	unknown	unknown
	119	1	unknown	unknown
	120	1	unknown	unknown
	121	1	unknown	unknown
	122	1	unknown	unknown
	123	1	unknown	unknown

## Sheet: Figure 2
Fig 2A	(Realtime-PCR)
		GAPDH	KIAA1199
	SGC-7901	18.8574	28.2425
		18.6436	28.199
		18.7062	28.4651
	MGC-803	16.3487	28.1345
		16.0266	28.0777
		15.6267	28.1035
	BGC-823	16.7937	27.9875
		16.8329	28.1516
		16.7013	27.9636
	NCI-N87	19.7734	26.9858
		19.6691	26.9195
		19.85	27.0197
	AGS	18.7522	28.0764
		18.697	28.0537
		18.4868	28.0578
Fig 2B	(Western blotting)		IntDen				IntDen		(Realtime-PCR)
	N87-con-KIAA1199	1	99099		AGS-con-KIAA1199	1	169640			GAPDH	KIAA1199			GAPDH	KIAA1199
		2	100618			2	166026		N87-con	16.8012	25.9091		AGS-con	16.0855	31.4418
		3	105491			3	168597			16.9597	26.0391			16.2398	31.744
	N87-con-GAPDH	4	80082		AGS-con-GAPDH	4	76889			16.9141	26.0112			16.2658	31.9068
		5	79316			5	79775		N87-shKIAA1199	16.5181	28.0317		AGS-shKIAA1199	16.378	33.4088
		6	78989			6	78179			16.4984	27.7405			16.3157	33.1441
	N87-shKIAA1199-KIAA1199	7	31322		AGS-shKIAA1199-KIAA1199	7	58044			16.4706	27.7092			16.3891	33.8928
		8	30836			8	61120
		9	31256			9	59772
	N87-shKIAA1199-GAPDH	10	74220		AGS-shKIAA1199-GAPDH	10	108079
		11	76492			11	99705
		12	73487			12	105178
Fig 2C	(MTT assay)
	group	24h	48h	72h	96h		group	24h	48h	72h	96h
	N87-sh-con	0.127	0.209	0.332	0.551		AGS-sh-con	0.2338	0.434	0.654	0.8928
	N87-sh-con	0.11	0.21	0.349	0.595		AGS-sh-con	0.2233	0.442	0.667	0.8941
	N87-sh-con	0.143	0.203	0.331	0.594		AGS-sh-con	0.2233	0.449	0.658	0.9112
	N87-sh-KIAA1199	0.12	0.182	0.286	0.423		AGS-sh-KIAA1199	0.2486	0.355	0.518	0.674
	N87-sh-KIAA1199	0.116	0.18	0.307	0.449		AGS-sh-KIAA1199	0.2326	0.343	0.507	0.68
	N87-sh-KIAA1199	0.116	0.17	0.279	0.44		AGS-sh-KIAA1199	0.2081	0.3726	0.521	0.671
Fig 2D	(Colony Formation)
	group	colone number		group	clone number
	N87-sh-con	101		AGS-sh-con	194
	N87-sh-con	95		AGS-sh-con	182
	N87-sh-con	93		AGS-sh-con	202
	N87-sh-KIAA1199	69		AGS-sh-KIAA1199	94
	N87-sh-KIAA1199	66		AGS-sh-KIAA1199	82
	N87-sh-KIAA1199	60		AGS-sh-KIAA1199	80
Fig 2E	(Scratch wounding migration assay)
	group	0h	24h	36h		group	0h	4h	8h
	N87-sh-con	5.54	4.79	4.64		AGS-sh-con	2.9	2.06	1.42
	N87-sh-con	5.81	5.12	4.91		AGS-sh-con	2.95	1.88	1.4
	N87-sh-con	6.02	5.15	4.94		AGS-sh-con	2.92	1.97	1.34
	N87-sh-KIAA1199	5.48	5.12	5.02		AGS-sh-KIAA1199	3.33	2.31	1.93
	N87-sh-KIAA1199	5.19	4.8	4.64		AGS-sh-KIAA1199	3.47	2.74	2.19
	N87-sh-KIAA1199	5.76	5.4	5.09		AGS-sh-KIAA1199	3.58	2.64	2.06
Fig 2F	(Transwell-migration)
	group	cell number		group	cell number
	N87-sh-con	435		AGS-sh-con	97
	N87-sh-con	415		AGS-sh-con	91
	N87-sh-con	449		AGS-sh-con	102
	N87-sh-KIAA1199	227		AGS-sh-KIAA1199	42
	N87-sh-KIAA1199	255		AGS-sh-KIAA1199	34
	N87-sh-KIAA1199	223		AGS-sh-KIAA1199	38
Fig 2G	(Transwell-invasion)
	group	cell number		group	cell number
	N87-sh-con	325		AGS-sh-con	369
	N87-sh-con	345		AGS-sh-con	374
	N87-sh-con	360		AGS-sh-con	361
	N87-sh-KIAA1199	186		AGS-sh-KIAA1199	80
	N87-sh-KIAA1199	182		AGS-sh-KIAA1199	87
	N87-sh-KIAA1199	187		AGS-sh-KIAA1199	95

## Sheet: Figure 3
Fig 3A	(Western blotting)		IntDen				IntDen		(Realtime-PCR)
	N87-con-KIAA1199	1	132027		AGS-con-KIAA1199	1	62017			GAPDH	β-catinin			GAPDH	β-catinin
		2	120951			2	60147		N87-con	17.9264	25.2578		AGS-con	15.8311	24.6469
		3	119653			3	61381			17.9727	25.3461			15.7005	24.2909
	N87-con-GAPDH	4	118001		AGS-con-GAPDH	4	57291			17.957	25.3381			15.9457	24.6202
		5	108022			5	56624		N87-shKIAA1199	17.8037	25.7719		AGS-shKIAA1199	16.2136	25.6876
		6	110235			6	58208			17.8976	25.803			16.259	25.7042
	N87-shKIAA1199-KIAA1199	7	44946		AGS-shKIAA1199-KIAA1199	7	34974			17.815	25.7781			16.201	25.5743
		8	42621			8	36084
		9	43017			9	39067
	N87-shKIAA1199-GAPDH	10	129393		AGS-shKIAA1199-GAPDH	10	66633
		11	117383			11	68805
		12	106444			12	69049
Fig 3B	(Western blotting )		IntDen				IntDen
	N87-con-CE-catenin	1	66540		AGS-con-CE-catenin	1	106833
		2	69968			2	105621
		3	71770			3	105478
	N87-con-NE-catenin	4	32642		AGS-con-NE-catenin	4	20037
		5	35576			5	25192
		6	33695			6	22160
	N87-shKIAA1199-CE-catenin	7	18349		AGS-shKIAA1199-CE-catenin	7	29471
		8	16390			8	31766
		9	17976			9	31804
	N87-shKIAA1199-NE-catenin	10	11920		AGS-shKIAA1199-NE-catenin	10	8553
		11	10291			11	9154
		12	10721			12	8781
Fig 3C	(Realtime-PCR for target genes)
		GAPDH	c-myc			GAPDH	c-myc
	N87-con	16.1187	20.9569		AGS-con	16.0372	23.7942
		16.1675	20.955			15.9433	23.8242
		16.1992	20.9556			16.0771	23.917
	N87-shKIAA1199	16.4015	21.7326		AGS-shKIAA1199	17.116	25.1103
		16.4325	21.8181			17.0453	25.027
		16.5433	21.8183			17.0679	25.1008
		GAPDH	cyclinD1			GAPDH	cyclinD1
	N87-con	16.1187	24.7969		AGS-con	16.0372	23.7254
		16.1675	24.7944			15.9433	23.7149
		16.1992	24.9255			16.0771	23.7938
	N87-shKIAA1199	16.4015	26.0764		AGS-shKIAA1199	17.116	26.7542
		16.4325	26.1133			17.0453	26.5756
		16.5433	26.3842			17.0679	26.8586
Fig 3D	(Realtime-PCR for target genes)
		GAPDH	Slug			GAPDH	Slug
	N87-con	17.9264	32.5173		AGS-con	16.2957	25.8936
		17.9727	33.2623			16.3804	26.0499
		17.957	32.9611			16.4703	25.9631
	N87-shKIAA1199	17.8037	32.5818		AGS-shKIAA1199	16.4291	27.614
		17.8968	32.9697			16.5001	27.248
		17.815	32.5999			16.542	27.6932
		GAPDH	Snail			GAPDH	Snail
	N87-con	16.5642	32.7706		AGS-con	16.2957	26.6196
		16.5621	32.7236			16.3804	26.6811
		16.5296	32.2815			16.4703	26.7302
	N87-shKIAA1199	16.6405	33.6998		AGS-shKIAA1199	16.4291	27.7636
		16.6469	33.7202			16.5001	27.8283
		16.6581	33.8934			16.542	27.8571
		GAPDH	Vimentin			GAPDH	Vimentin
	N87-con	16.5642	33.5596		AGS-con	16.2957	25.6602
		16.5621	34.131			16.3804	25.6198
		16.5296	34.3818			16.4703	25.6077
	N87-shKIAA1199	16.6405	35.9346		AGS-shKIAA1199	16.4291	25.9086
		16.6469	36.0265			16.5001	25.9426
		16.6581	36.305			16.542	25.9152
		GAPDH	Twist			GAPDH	Twist
	N87-con	16.7248	35.1669		AGS-con	16.8074	32.0813
		16.7519	35.4543			16.804	31.9639
		16.7425	34.9369			16.8397	31.9148
	N87-shKIAA1199	17.1886	36.9121		AGS-shKIAA1199	16.3544	34.7563
		17.166	35.3515			16.3483	34.9603
		17.0861	35.6361			16.3181	34.9535
Fig 3E	(Realtime-PCR for target genes)
		GAPDH	MMP2			GAPDH	MMP2
	N87-con	16.9776	28.6531		AGS-con	16.2957	25.0547
		17.0851	28.6543			16.3804	25.1481
		16.982	28.805			16.4703	25.2338
	N87-shKIAA1199	16.9315	28.7541		AGS-shKIAA1199	16.4291	25.5155
		16.9555	28.7457			16.5001	25.5851
		16.918	28.9249			16.542	25.784
		GAPDH	MMP7			GAPDH	MMP7
	N87-con	16.5642	32.82		AGS-con	16.2957	25.5485
		16.5621	32.8799			16.3804	25.737
		16.5296	33.4872			16.4703	25.5229
	N87-shKIAA1199	16.6405	34.62		AGS-shKIAA1199	16.4291	28.0957
		16.6469	34.6794			16.5001	28.1246
		16.6581	35.0251			16.542	28.0668
		GAPDH	MMP9			GAPDH	MMP9
	N87-con	16.5642	34.4676		AGS-con	15.8332	29.8366
		16.5621	34.8587			15.5628	29.6441
		16.5296	34.6763			15.503	29.5537
	N87-shKIAA1199	16.6405	35.076		AGS-shKIAA1199	15.8536	29.9005
		16.6469	35.1173			15.8536	30.1336
		16.6581	36.0216			15.8142	29.6687
		GAPDH	MMP14			GAPDH	MMP14
	N87-con	16.5642	32.8001		AGS-con	16.2957	22.2791
		16.5621	32.9671			16.3804	22.391
		16.5296	32.4225			16.4703	22.3898
	N87-shKIAA1199	16.6405	35.2828		AGS-shKIAA1199	16.4291	24.3732
		16.6469	35.9843			16.5001	24.1183
		16.6581	36.5191			16.542	25.354
